# Supplementary material
Source: Elsevier journal article supplement (https://www.sciencedirect.com/science/article/pii/S0870255122000622)
Supplement: mmc1 [file S0870255122000622:mmc1.doc]

**SUPPLEMENTARY APPENDIX**

| Table S1. STEMI admissions during the two study periods in HospA | | | | | | |
| --- | --- | --- | --- | --- | --- | --- |
|  | P1 (March-April) | | | P2 (May-June) | | |
|  | 2017-2019 | 2020 | *p*-value | 2017-2019 | 2020 | *p*-value |
| Total number of admissions | 52 | 11 | - | 69 | 24 | - |
| STEMI cases by month (Mean ± SD) | 8.5±3.5 | 5.5±0.7 | 0.374 | 10.0±2.8 | 12.0±1.4 | 0.874 |
| STEMI – ST elevation myocardial infarction; SD – standard deviation | | | | | | |

| Table S2. STEMI admissions during the two study periods in HospB | | | | | | |
| --- | --- | --- | --- | --- | --- | --- |
|  | P1 (March-April) | | | P2 (May-June) | | |
|  | 2017-2019 | 2020 | *p*-value | 2017-2019 | 2020 | *p*-value |
| Total number of admissions | 104 | 22 | - | 117 | 41 | - |
| STEMI cases by month (Mean ± SD) | 17.5±0.7 | 11.0±4.2 | 0.234 | 19.5±0.7 | 20.5±0.7 | 0.626 |
| STEMI – ST elevation myocardial infarction; SD – standard deviation | | | | | | |

| Table S3. Patient demographics in HospA | | | | | | |
| --- | --- | --- | --- | --- | --- | --- |
|  | P1 (March-April) | | | P2 (May-June | | |
|  | 2017-2019 | 2020 | *p*-value | 2017-2019 | 2020 | *p*-value |
| Age (years) mean±SD | 55.6±12.6 | 58.3±13.2 | 0.509 | 59.8±12.8 | 58.4±11.1 | 0.686 |
| Male n (%) | 41 (78.8) | 9 (81.8) | 0.825 | 37 (77.1) | 15 (88.2) | 0.323 |
| High-risk patients  n (%) | 43 (82.7) | 8 (72.7) | 0.444 | 39 (81.3) | 13 (76.5) | 0.672 |
| Diabetes (n %) | 11 (21.2) | 2 (18.2) | 0.825 | 14 (29.2) | 5 (29.4) | 0.985 |
| Smoking history n (%) | 38 (73.1) | 5 (45.5) | 0.074 | 30 (62.5) | 10 (58.8) | 0.789 |
| Hypertension n (%) | 27 (51.9) | 5 (45.5) | 0.697 | 27 (56.3) | 9 (52.9) | 0.814 |
| Dyslipidemia n (%) | 21 (40.4) | 6 (54.5) | 0.389 | 19 (39.6) | 4 (23.5) | 0.234 |
| Previous AMI n (%) | 5 (9.6) | 1 (9.1) | 0.957 | 3 (6.3) | 1 (5.9) | 0.957 |
| Previous PCI  n (%) | 5 (9.6) | 1 (9.1) | 0.957 | 6 (12.5) | 1 (5.9) | 0.449 |
| CAD family history n (%) | 6 (11.5) | 0 (0.0) | 0.236 | 1 (2.1) | 0 (0.0) | 0.549 |
| SD – standard deviation; AMI – acute myocardial infarction; PCI – percutaneous coronary intervention; CAD – coronary artery disease | | | | | | |

| Table S4. Patient demographics in HospB | | | | | | |
| --- | --- | --- | --- | --- | --- | --- |
|  | P1 (March-April) | | | P2 (May-June | | |
|  | 2017-2019 | 2020 | *p*-value | 2017-2019 | 2020 | *p*-value |
| Age (years) mean±SD | 61.5±12.4 | 61.6±17.1 | 0.955 | **64.5±12.5** | **57.3±12.9** | **0.018** |
| Male n (%) | 72 (69.1) | 15 (68.2) | 0.923 | 54 (78.3) | 17 (70.8) | 0.461 |
| High-risk patients  n (%) | 71 (68.3) | 17 (77.3) | 0.358 | 41 (59.4) | 17 (70.8) | 0.320 |
| Diabetes (n %) | 24 (23.1) | 3 (13.6) | 0.327 | 10 (14.5) | 4 (16.7) | 0.798 |
| Smoking history n (%) | 52 (50.0) | 15 (68.2) | 0.120 | 35 (50.7) | 16 (66.7) | 0.176 |
| Hypertension n (%) | 64 (61.5) | 9 (40.9) | 0.075 | 35 (50.7) | 14 (58.3) | 0.520 |
| Dyslipidemia n (%) | 43 (41.3) | 11 (50.0) | 0.456 | 22 (31.9) | 8 (33.3) | 0.896 |
| Previous AMI n (%) | 11 (10.6) | 4 (18.2) | 0.317 | 4 (5.8) | 1 (4.2) | 0.760 |
| Previous PCI  n (%) | 15 (14.4) | 5 (22.7) | 0.333 | 2 (2.9) | 1 (4.2) | 0.762 |
| CAD family history n (%) | 7 (6.7) | 2 (9.1) | 0.696 | 8 (11.6) | 2 (8.3) | 0.657 |
| SD – standard deviation; AMI – acute myocardial infarction; PCI – percutaneous coronary intervention; CAD – coronary artery disease | | | | | | |

| Table S5. Patient form of presentation in HospA | | | | | | |
| --- | --- | --- | --- | --- | --- | --- |
|  | P1 (March-April) | | | P2 (May-June) | | |
|  | 2017-2019 | 2020 | *p*-value | 2017-2019 | 2020 | *p*-value |
| Access to the hospital n (%) |  |  |  |  |  |  |
| *Ambulance* | 6 (11.5) | 0 (0.0) | 0.236 | 12 (25.0) | 2 (11.8) | 0.254 |
| *Spoke* | 24 (46.2) | 8 (72.7) | 0.109 | 19 (36.6) | 9 (52.9) | 0.339 |
| *Hub* | 22 (42.3) | 3 (27.3) | 0.354 | 17 (35.4) | 6 (35.3) | 0.993 |
|  |  |  |  |  |  |  |
| OHCA n (%) | 2 (3.8) | 1 (9.1) | 0.458 | 6 (12.5) | 2 (11.8) | 0.937 |
| Cardiogenic Shock  n (%) | 2 (3.8) | 1 (9.1) | 0.458 | 6 (12.5) | 0 (0.0) | 0.126 |
| Thrombolysis  n (%) | 21 (40.4) | 6 (54.5) | 0.389 | 18 (37.5) | 7 (41.2) | 0.789 |
| Rescue PCI after failed thrombolysis  n (%) | **3 (5.8)** | **3 (27.3)** | **0.027** | 3 (6.3) | 1 (5.9) | 0.957 |
| Periprocedural P2Y12 therapy  n (%) |  |  |  |  |  |  |
| *Clopidogrel* | 16 (30.8) | 5 (45.5) | 0.348 | 12 (25.0) | 2 (11.8) | 0.254 |
| *Ticagrelor* | 36 (69.2) | 6 (54.5) | 0.348 | 36 (75.0) | 15 (88.2) | 0.254 |
|  |  |  |  |  |  |  |
| Radial Access  n (%) | 44 (84.6) | 9 (81.8) | 0.818 | 41 (85.4) | 16 (94.1) | 0.348 |
| Diseased vessels  (Mean ± SD) | 1.46±0.67 | 1.64±0.67 | 0.397 | 1.40±0.58 | 1.41±0.51 | 0.770 |
| Ambulance – patients who accessed the hospital after calling the national emergency system and are diagnosed in an out-of-hospital setting; Spoke – patients who first accessed a non-PCI hospital center; Hub – patients who directly accessed a PCI hospital center; OHCA – out of hospital cardiac arrest; PCI – percutaneous coronary intervention; SD – standard deviation | | | | | | |

| Table S6. Patient form of presentation in HospB | | | | | | |
| --- | --- | --- | --- | --- | --- | --- |
|  | P1 (March-April) | | | P2 (May-June) | | |
|  | 2017-2019 | 2020 | *p*-value | 2017-2019 | 2020 | *p*-value |
| Access to the hospital n (%) |  |  |  |  |  |  |
| *Ambulance* | 22 (21.2) | 5 (22.7) | 0.870 | 20 (29.0) | 6 (25.0) | 0.708 |
| *Spoke* | 81 (77.9) | 16 (72.7) | 0.602 | 48 (69.6) | 18 (75.0) | 0.613 |
| *Hub* | 1 (1.0) | 1 (4.5) | 0.222 | 1 (1.4) | 0 (0.0) | 0.553 |
|  |  |  |  |  |  |  |
| OHCA n (%) | 4 (3.8) | 1 (4.5) | 0.879 | 6 (8.7) | 2 (8.3) | 0.957 |
| Cardiogenic Shock  n (%) | 8 (7.7) | 1 (4.5) | 0.603 | 7 (10.1) | 3 (12.5) | 0.748 |
| Thrombolysis  n (%) | - | - | - | - | - | - |
| Rescue PCI after failed thrombolysis  n (%) | - | - | **-** | - | - | - |
| Periprocedural P2Y12 therapy  n (%) |  |  |  |  |  |  |
| *Clopidogrel* | 14 (13.5) | 3 (14.3) | 0.983 | 9 (13.2) | 6 (25.0) | 0.170 |
| *Ticagrelor* | 90 (86.5) | 17 (81.0) | 0.270 | 59 (86.8) | 18 (75.0) | 0.240 |
|  |  |  |  |  |  |  |
| Radial Access  n (%) | 95 (91.3) | 19 (86.4) | 0.469 | 64 (92.8) | 22 (91.7) | 0.862 |
| Diseased vessels  (Mean ± SD) | 1.47±0.70 | 1.55±0.74 | 0.734 | 1.39±0.65 | 1.54±0.66 | 0.226 |
| Ambulance – patients who accessed the hospital after calling the national emergency system and are diagnosed in an out-of-hospital setting; Spoke – patients who first accessed a non-PCI hospital center; Hub – patients who directly accessed a PCI hospital center; OHCA – out of hospital cardiac arrest; PCI – percutaneous coronary intervention; SD – standard deviation | | | | | | |

| Table S7. STEMI care key-time components in HospA | | | | | | |
| --- | --- | --- | --- | --- | --- | --- |
|  | P1 (March-April) | | | P2 (May-June) | | |
|  | 2017-2019 | 2020 | *p*-value | 2017-2019 | 2020 | *p*-value |
| STEMI time components (median [IQR], in minutes) |  |  |  |  |  |  |
| *Pain to first medical contact (FMC)* | 77.0 (30.0-167.0) | 180.0 (60.0-453.75) | 0.081 | 120.0 (60.0-290.0) | 120.0 (38.0-246.0) | 0.716 |
| *Door to needle time (DTN)* | 27.0 (13.8-48.8) | 82.5 (27.5-150.0) | 0.056 | 32.5 (26.3-46.5) | 30.0 (28.0-105.0) | 0.974 |
| *Door to wire crossing time (DTWC)* | 95.5 (70.8-125.0) | 151.0 (45.0-239.0) | 0.697 | 91.5 (62.5-205.0) | 88.5 (64.3-254.0) | 0.866 |
| *Symptoms to wire crossing time (STWC)* | **218.0 (176.8-524.3)** | **652.0 (432.0-962.0)** | 0.031 | 270.0 (157.0-592.0) | 248.0 (172.5-780.0) | 0.736 |
| FMC – Pain to first medical contact; DTN – Door to needle; DTWC – Door to wire crossing; STWC – Symptoms to wire crossing; STEMI – ST elevation myocardial infarction; IQR – interquartile range | | | | | | |

| Table S8. STEMI care key-time components in HospB | | | | | | |
| --- | --- | --- | --- | --- | --- | --- |
|  | P1 (March-April) | | | P2 (May-June) | | |
|  | 2017-2019 | 2020 | *p*-value | 2017-2019 | 2020 | *p*-value |
| STEMI time components (median [IQR], in minutes) |  |  |  |  |  |  |
| *Pain to first medical contact (FMC)* | 120.0 (63.0-211.0) | 112.0 (62.0-168.0) | 0.571 | 90.0 (60.0-175.5) | 122.5 (67.5-213.8) | 0.167 |
| *Door to needle time (DTN)* | - | - | - | - | - | - |
| *Door to wire crossing time (DTWC)* | 29.0 (22.0-45.0) | 34.5 (25.0-45.0) | 0.286 | **28.0 (21.5-34.0)** | **33.0 (25.0-45.0)** | **0.030** |
| *Symptoms to wire crossing time (STWC)* | 242.5 (154.3-374.5) | 219.5 (164.0-506.75) | 0.913 | **225.0 (151.0-288.0)** | **255.5 (205.8-397.8)** | **0.014** |
| FMC – Pain to first medical contact; DTN – Door to needle; DTWC – Door to wire crossing; STWC – Symptoms to wire crossing; STEMI – ST elevation myocardial infarction; IQR – interquartile range | | | | | | |

| Table S9. Inhospital outcomes in HospA | | | | | | |
| --- | --- | --- | --- | --- | --- | --- |
|  | P1 (March-April) | | | P2 (May-June) | | |
|  | 2017-2019 | 2020 | *p*-value | 2017-2019 | 2020 | *p*-value |
| Killip-Kimball Class evolution  n (%) |  |  |  |  |  |  |
| *III* | 2 (3.8) | 0 (0.0) | 0.509 | 1 (2.1) | 2 (11.8) | 0.102 |
| *IV* | 2 (3.8) | 2 (18.2) | 0.076 | 7 (14.6) | 0 (0.0) | 0.096 |
|  |  |  |  |  |  |  |
| BARC 3-5 Bleeding  n (%) | **0 (0.0)** | **1 (9.1)** | **0.028** | 1 (2.1) | 1 (5.9) | 0.436 |
| Heart Failure  n (%) | 11 (21.2) | 3 (27.3) | 0.657 | 9 (18.8) | 3 (17.6) | 0.920 |
| Mechanical Ventilation  n (%) | 4 (7.7) | 3 (27.3) | 0.060 | 4 (8.3) | 2 (11.8) | 0.674 |
| Mechanical complication  n (%) | 0 (0.0) | 0 (0.0) | **-** | 0 (0.0) | 0 (0.0) | - |
| Additional PCI  n (%) |  |  |  |  |  |  |
| *Intraprocedure* | 4 (7.7) | 0 (0.0) | 0.342 | 8 (16.7) | 1 (5.9) | 0.269 |
| *Staged* | 3 (5.8) | 1 (9.1) | 0.681 | 2 (4.2) | 2 (11.8) | 0.263 |
|  |  |  |  |  |  |  |
| Hospitalization days  (Mean ± SD) | 6.1±3.9 | 10.0±9.5 | 0.881 | 8.5±11.2 | 5.9±2.7 | 0.535 |
| Mortality | **1 (1.9)** | **2 (18.2)** | **0.021** | 2 (4.2) | 0 (0.0) | 0.393 |
| BARC – Bleeding Academic Research Consortium; PCI – percutaneous coronary intervention; SD – standard deviation | | | | | | |

| Table S10. Inhospital outcomes in HospB | | | | | | |
| --- | --- | --- | --- | --- | --- | --- |
|  | P1 (March-April) | | | P2 (May-June) | | |
|  | 2017-2019 | 2020 | *p*-value | 2017-2019 | 2020 | *p*-value |
| Killip-Kimball Class evolution  n (%) |  |  |  |  |  |  |
| *III* | 3 (2.9) | 1 (4.5) | 0.686 | 0 (0.0) | 1 (4.2) | 0.088 |
| *IV* | 8 (7.7) | 1 (4.5) | 0.603 | 6 (8.7) | 3 (12.5) | 0.587 |
|  |  |  |  |  |  |  |
| BARC 3-5 Bleeding  n (%) | 5 (4.9) | 2 (9.1) | 0.440 | 5 (7.2) | 1 (4.2) | 0.597 |
| Heart Failure  n (%) | 17 (16.7) | 2 (9.1) | 0.371 | 8 (11.6) | 4 (16.7) | 0.523 |
| Mechanical Ventilation  n (%) | 6 (5.9) | 0 (0.0) | 0.244 | 8 (11.6) | 1 (4.2) | 0.289 |
| Mechanical complication  n (%) | **0 (0.0)** | **1 (4.5)** | **0.029** | 1 (1.4) | 0 (0.0) | 0.553 |
| Additional PCI  n (%) |  |  |  |  |  |  |
| *Intraprocedure* | 8 (7.7) | 3 (15.0) | 0.370 | 3 (4.3) | 1 (4.2) | 0.970 |
| *Staged* | 6 (5.8) | 0 (0.0) | 0.248 | 4 (5.8) | 4 (16.7) | 0.102 |
|  |  |  |  |  |  |  |
| Hospitalization days  (Mean ± SD) | 7.6±10.2 | 4.8±4.3 | 0.095 | 6.7±6.9 | 6.8±8.4 | 0.598 |
| Mortality | 2 (1.9) | 2 (9.1) | 0.081 | 3 (4.3) | 0 (0.0) | 0.299 |
| BARC – Bleeding Academic Research Consortium; PCI – percutaneous coronary intervention; SD – standard deviation | | | | | | |
